# Supplementary material
Source: PubMed Central journal article supplement (PMC1356340)
Supplement: 7600903s1.pdf [file 7600903s1.pdf]

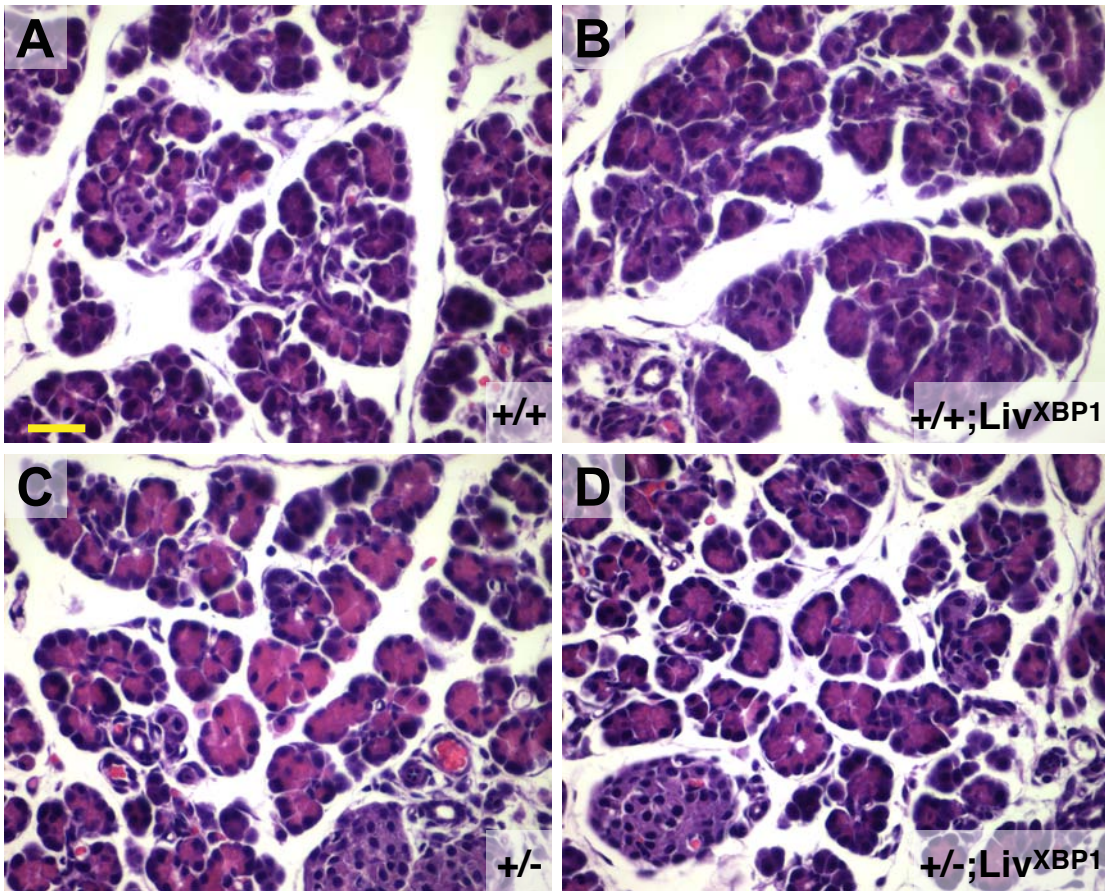

Supplementary Figure 1. Histologic comparison of pancreases used as controls throughout this study. (A) XBP-1<sup>+/+</sup>(wild-type). (B) XBP-1<sup>+/+</sup>;Liv<sup>XBP1</sup> (C) XBP-1<sup>+/-</sup> (D) XBP-1<sup>+/-</sup>;Liv<sup>XBP1</sup>. Pancreases from all four genotypes were histologically indistinguishable and were interchangeably used as controls. Scale 30  $\mu$ m.
