# Supplementary material
Source: PubMed Central journal article supplement (PMC1356340)
Supplement: 7600903s2.pdf [file 7600903s2.pdf]

Supplementary table 1. Sequences of real time PCR primers

| Gene        | Forward                      | Reverse                   |
|-------------|------------------------------|---------------------------|
| Grp78       | TCATCGGACGCACTTGGAA          | CAACCACCTTGAATGGCAAGA     |
| Grp94       | TGTATGTACGCCGCGTATTCA        | TCGGAATCCACAACACCTTTG     |
| Sec61a      | CTATTTCCAGGGCTTCCGAGT        | AGGTGTTGTACTGGCCTCGGT     |
| ERdj4       | CCCCAGTGTCAAACGTACCAG        | AGCGTTTCCAATTTTCCATAAATT  |
| ERdj5       | GCTGGCTGATCACATTCTGCT        | GCCGTCCAACATGCCACTA       |
| Herp        | CATGTACCTGCACCACGTCG         | GAGGACCACCATCATCCGG       |
| EDEM        | AAGCCCTCTGGAACCTTGCG         | AACCCAATGGCCTGTCTGG       |
| PDI         | CAAGATCAAGCCCCACCTGAT        | AGTTCGCCCCAACCCAGTACTT    |
| PDI-P5      | AGCTCGTCAAGGATCGCCT          | TATCACCTCTGCCCTGCTTTC     |
| PDIp        | GGAGGTCACCTGCCTAAGGAG        | TGGAATTGGCTTGTGCTTCTG     |
| Grp58       | GAGGCTTGCCCCTGAGTATG         | GTTGGCAGTGCAATCCACC       |
| Ero1L       | TCAGTGGACCAAGCATGATGA        | TCCACATACTCAGCATCGGG      |
| CHOP        | GTCCCTAGCTTGGCTGACAGA        | TGGAGAGCGAGGGCTTTG        |
| XBP-1*      | CCTGAGCCCGGAGGAGAA           | CTCGAGCAGTCTGCGCTG        |
| Amylase 2   | GCAACAATGTTGGTGTCCGTAT       | AATTCCTGTTATTTGGATTGAGG   |
| Elastase I  | GGCTCCTCTGTGAAGAATACCATG     | CCCAGAATCACCTGGCAT        |
| Elastase II | TGCTGCAGACCAATGGGAA          | CATAGTCCACAACCAGCAGGC     |
| Insulin II  | CGTGGCTTCTTCTACACACCC        | AGCTCCAGTTGTGCCACTTGT     |
| Glucagon    | AAACCAAGATCACTGACAAGAAATAGGT | TTTGAAATTGTACATCCCAAGTGAC |
| beta-actin  | GCTCTGGCTCCTAGCACCAT         | GCCACCGATCCACACCGCGT      |

\* This primer set does not recognize XBP-1 knock-out allele.
